# Supplementary material for: Models of comprehensive care for older persons with chronic diseases: a systematic review with a focus on effectiveness
Source: HighWire-hosted journal article supplement (doi:10.1136/bmjopen-2021-059606), 2022-08-01
Supplement: bmjopen-2021-059606supp001_data_supplement.pdf [file bmjopen-2021-059606supp001_data_supplement.pdf]

**Supplementary file 1. Search strategies in the databases.**

| <b>MEDLINE</b>                                                                                                                                                                                                                                                                                                                                                                                                                                                                                |
|-----------------------------------------------------------------------------------------------------------------------------------------------------------------------------------------------------------------------------------------------------------------------------------------------------------------------------------------------------------------------------------------------------------------------------------------------------------------------------------------------|
| aged[MeSH Terms]                                                                                                                                                                                                                                                                                                                                                                                                                                                                              |
| aged, 80 and over[MeSH Terms]                                                                                                                                                                                                                                                                                                                                                                                                                                                                 |
| frail elderly[MeSH Terms]                                                                                                                                                                                                                                                                                                                                                                                                                                                                     |
| middle aged[MeSH Terms]                                                                                                                                                                                                                                                                                                                                                                                                                                                                       |
| OLDER ADULT                                                                                                                                                                                                                                                                                                                                                                                                                                                                                   |
| "Elderly" OR "Oldest Old" OR "Nonagenarians" OR "Nonagenarian" OR "Octogenarians" OR "Octogenarian" OR "Centenarians" OR "Centenarian" OR "Elderly, Frail" OR "Frail Elders" OR "Elder, Frail" OR "Elders, Frail" OR "Frail Elder" OR "Functionally-Impaired Elderly" OR "Elderly, Functionally-Impaired" OR "Functionally Impaired Elderly" OR "Frail Older Adults" OR "Adult, Frail Older" OR "Adults, Frail Older" OR "Frail Older Adult" OR "Older Adult, Frail" OR "Older Adults, Frail" |
| #1 OR #2 OR #3 OR #4 OR #5 OR #6                                                                                                                                                                                                                                                                                                                                                                                                                                                              |
| chronic disease[MeSH Terms]                                                                                                                                                                                                                                                                                                                                                                                                                                                                   |
| "Chronic Diseases" OR "Disease, Chronic" OR "Diseases, Chronic" OR "Chronic Illness" OR "Chronic Illnesses" OR "Illness, Chronic" OR "Illnesses, Chronic" OR "Chronically Ill"                                                                                                                                                                                                                                                                                                                |
| multiple chronic conditions[MeSH Terms]                                                                                                                                                                                                                                                                                                                                                                                                                                                       |
| comorbidity[MeSH Terms]                                                                                                                                                                                                                                                                                                                                                                                                                                                                       |
| Multimorbidity[MeSH Terms]                                                                                                                                                                                                                                                                                                                                                                                                                                                                    |
| chronic illnesses                                                                                                                                                                                                                                                                                                                                                                                                                                                                             |
| "Chronic Conditions, Multiple" OR "Multiple Chronic Health Conditions" OR "Multiple Chronic Medical Conditions" OR "Multiple Chronic Illnesses" OR "Chronic Illnesses, Multiple"                                                                                                                                                                                                                                                                                                              |
| #8 OR #9 OR #10 OR #11 OR #12 OR #13 OR #14                                                                                                                                                                                                                                                                                                                                                                                                                                                   |
| primary health care[MeSH Terms]                                                                                                                                                                                                                                                                                                                                                                                                                                                               |
| "Care, Primary Health" OR "Health Care, Primary" OR "Primary Healthcare" "Healthcare, Primary" OR "Primary Care" OR "Care, Primary"                                                                                                                                                                                                                                                                                                                                                           |
| #16 OR #17                                                                                                                                                                                                                                                                                                                                                                                                                                                                                    |
| community health services[MeSH Terms]                                                                                                                                                                                                                                                                                                                                                                                                                                                         |
| community health planning[MeSH Terms]                                                                                                                                                                                                                                                                                                                                                                                                                                                         |
| "Health Services, Community" OR "Community Health Service" OR "Health Service, Community" OR "Service, Community Health" OR "Services, Community Health" OR "Community Health Care" OR "Care, Community Health" OR "Health Care, Community" OR "Community Healthcare" OR "Community Healthcares" OR "Healthcare, Community" OR "Healthcares, Community"                                                                                                                                       |

|                                                                                                                                                                                                                                                                                                                                                                                                                                                                                                                    |
|--------------------------------------------------------------------------------------------------------------------------------------------------------------------------------------------------------------------------------------------------------------------------------------------------------------------------------------------------------------------------------------------------------------------------------------------------------------------------------------------------------------------|
| "Community Health Plannings" OR "Health Planning, Community" OR "Health Plannings, Community" OR "Planning, Community Health" OR "Plannings, Community Health" OR "Population-Based Planning" OR "Planning, Population-Based" OR "Plannings, Population-Based" OR "Population Based Planning" OR "Population-Based Plannings" OR "Community Health Systems" OR "Community Health System" OR "Health System, Community" OR "Health Systems, Community" OR "System, Community Health" OR "Systems, Community Health" |
| community medicine[MeSH Terms]                                                                                                                                                                                                                                                                                                                                                                                                                                                                                     |
| "Medicine, Community"                                                                                                                                                                                                                                                                                                                                                                                                                                                                                              |
| public health[MeSH Terms]                                                                                                                                                                                                                                                                                                                                                                                                                                                                                          |
| "Health, Public" OR "Community Health" OR "Health, Community" OR "Environment, Preventive Medicine and Public Health" OR "Environment, Preventive Medicine and Public Health"                                                                                                                                                                                                                                                                                                                                      |
| #19 OR #20 OR #21 OR #22 OR #23 OR #24 OR #25 OR #26                                                                                                                                                                                                                                                                                                                                                                                                                                                               |
| "Clinical model" OR "care model" OR "Models of Care"                                                                                                                                                                                                                                                                                                                                                                                                                                                               |
| models, educational[MeSH Terms]                                                                                                                                                                                                                                                                                                                                                                                                                                                                                    |
| "Instructional Models" OR "Instructional Model" OR "Model, Instructional" OR "Models, Instructional" OR "Educational Models" OR "Educational Model OR "Model, Educational"                                                                                                                                                                                                                                                                                                                                         |
| #28 OR #29 OR #30                                                                                                                                                                                                                                                                                                                                                                                                                                                                                                  |
| "Management, Medication Therapy" OR "Therapy Management, Medication" OR "Drug Therapy Management" OR "Management, Drug Therapy" OR "Therapy Management, Drug" OR "MEDICARE Prescription Drug" OR "Improvement and Modernization Act of 2003"                                                                                                                                                                                                                                                                       |
| "management of chronic conditions"                                                                                                                                                                                                                                                                                                                                                                                                                                                                                 |
| medication therapy management[MeSH Terms]                                                                                                                                                                                                                                                                                                                                                                                                                                                                          |
| #32 OR #33 OR #34                                                                                                                                                                                                                                                                                                                                                                                                                                                                                                  |
| self management[MeSH Terms]                                                                                                                                                                                                                                                                                                                                                                                                                                                                                        |
| management, safety[MeSH Terms]                                                                                                                                                                                                                                                                                                                                                                                                                                                                                     |
| "self-management support"                                                                                                                                                                                                                                                                                                                                                                                                                                                                                          |
| "self-management"                                                                                                                                                                                                                                                                                                                                                                                                                                                                                                  |
| #36 OR #37 OR #38 OR #39                                                                                                                                                                                                                                                                                                                                                                                                                                                                                           |
| public policy[MeSH Terms]                                                                                                                                                                                                                                                                                                                                                                                                                                                                                          |
| "Policies, Public" OR "Policy, Public" OR "Public Policies" OR "Migration Policy" OR "Migration Policies" OR "Policies, Migration" OR "Policy, Migration" OR "Affirmative Action" OR "Action, Affirmative" OR "Social Protection" OR "Protection, Social" OR "Population Policy" OR "Policies, Population" OR "Policy, Population" OR "Population Policies" OR "Social Policy" OR "Policies, Social" OR "Policy, Social" OR "Social Policies"                                                                      |
| "health system"                                                                                                                                                                                                                                                                                                                                                                                                                                                                                                    |
| #41 OR #42 OR #43                                                                                                                                                                                                                                                                                                                                                                                                                                                                                                  |
| healthy people programs[MeSH Terms]                                                                                                                                                                                                                                                                                                                                                                                                                                                                                |
| "social protection"                                                                                                                                                                                                                                                                                                                                                                                                                                                                                                |

|                                                                                                                                                         |
|---------------------------------------------------------------------------------------------------------------------------------------------------------|
| "healthy People Program" OR "Healthy People 2010" OR "Healthy People 2020" OR "Healthy People 2020s" OR "People 2020, Healthy" OR "Healthy People 2000" |
| "social protection systems"                                                                                                                             |
| "healthcare intervention programs"                                                                                                                      |
| #45 OR #46 OR #47 OR #48 OR #49                                                                                                                         |
| "Integrated Care AND "Older People"                                                                                                                     |
| "Integrated Care" AND "Older People"                                                                                                                    |
| "Integrated Care for Older People"                                                                                                                      |
| #52 OR #53                                                                                                                                              |
| (#7 AND #15 AND #18) AND #31                                                                                                                            |
| (#7 AND #15 AND #18) AND #31                                                                                                                            |
| (#7 AND #15 AND #18) AND #31                                                                                                                            |
| (#7 AND #15 AND #18) AND #35                                                                                                                            |
| (#7 AND #15 AND #18) AND #40                                                                                                                            |
| (#7 AND #15 AND #18) AND #44                                                                                                                            |
| (#7 AND #15 AND #18) AND #50                                                                                                                            |
| (#7 AND #15 AND #18) AND #54                                                                                                                            |
| (#7 AND #15 AND #27) AND #31                                                                                                                            |
| (#7 AND #15 AND #27) AND #35                                                                                                                            |
| (#7 AND #15 AND #27) AND #40                                                                                                                            |
| (#7 AND #15 AND #27) AND #44                                                                                                                            |
| (#7 AND #15 AND #27) AND #50                                                                                                                            |
| (#7 AND #15 AND #27) AND #54                                                                                                                            |

### Trip Database

|                                                                                                |
|------------------------------------------------------------------------------------------------|
| (Older Adult AND Chronic Disease)(Primary Health Care OR Community Health Services )           |
| (Older Adult AND Chronic Disease)(Primary Health Care OR Community Health Services )           |
| (Older Adult AND Chronic Disease)(Primary Health Care OR Community Health Services ) from:1966 |
| (Older Adult AND Chronic Disease)(Primary Health Care OR Community Health Services ) from:1966 |
| (Older Adult AND Chronic Disease)(Primary Health Care OR Community Health Services ) from:1966 |
| (Older Adult AND Chronic Disease)(Primary Health Care OR Community Health Services )           |
| (Older Adult AND Chronic Disease)(Primary Health Care OR Community Health Services )           |

|                                                                                                                                                                                                                                                                                        |
|----------------------------------------------------------------------------------------------------------------------------------------------------------------------------------------------------------------------------------------------------------------------------------------|
| (Older Adult AND Chronic Disease)(Primary Health Care OR Community Health Services ) from:1966                                                                                                                                                                                         |
| (Older Adult AND Chronic Disease)(Primary Health Care OR Community Health Services ) from:1966                                                                                                                                                                                         |
| (title:Older Adult AND (chronic condition OR chronic illnesses OR Chronic Disease OR Multiple Chronic Conditions OR Comorbidity OR Multimorbidity))(title:Primary Health Care OR Community )                                                                                           |
| (title:Older Adult AND (chronic condition OR chronic illnesses OR Chronic Disease OR Multiple Chronic Conditions OR Comorbidity OR Multimorbidity))(title:Primary Health Care OR Community )                                                                                           |
| (title:Older Adult AND (chronic condition OR chronic illnesses OR Chronic Disease OR Multiple Chronic Conditions OR Comorbidity OR Multimorbidity))(title:Primary Health Care OR Community )                                                                                           |
| (title:Older Adult AND (chronic condition OR chronic illnesses OR Chronic Disease OR Multiple Chronic Conditions OR Comorbidity OR Multimorbidity))(title:Primary Health Care OR Community )                                                                                           |
| (title:(middle aged OR aged OR aged 80 and over OR frail elderly) AND (chronic condition OR chronic illnesses OR Chronic Disease OR Multiple Chronic Conditions OR Comorbidity OR Multimorbidity))(title:(model AND care OR programs OR management OR self management))                |
| (title:(middle aged OR aged OR aged 80 and over OR frail elderly) AND (chronic condition OR chronic illnesses OR Chronic Disease OR Multiple Chronic Conditions OR Comorbidity OR Multimorbidity))(title:(model AND care OR programs OR management OR self management))                |
| (title:(middle aged OR aged OR aged 80 and over OR frail elderly) AND (chronic condition OR chronic illnesses OR Chronic Disease OR Multiple Chronic Conditions OR Comorbidity OR Multimorbidity))(title:(model AND care OR programs OR management OR self management))                |
| (title:(middle aged OR aged OR aged 80 and over OR frail elderly) AND (chronic condition OR chronic illnesses OR Chronic Disease OR Multiple Chronic Conditions OR Comorbidity OR Multimorbidity))(title:(model AND care OR programs OR management OR self management))                |
| (title:(middle aged OR aged OR aged 80 and over OR frail elderly) AND (chronic condition OR chronic illnesses OR Chronic Disease OR Multiple Chronic Conditions OR Comorbidity OR Multimorbidity))(title:(model AND care OR programs OR management OR self management))                |
| (title:(middle aged OR aged OR aged 80 and over OR frail elderly) AND (chronic condition OR chronic illnesses OR Chronic Disease OR Multiple Chronic Conditions OR Comorbidity OR Multimorbidity))(title:(model AND care OR programs OR management OR self management))                |
| (title:older adult OR middle aged OR aged OR aged 80 and over OR frail elderly)(title:integrated care )                                                                                                                                                                                |
| (title:older adult OR middle aged OR aged OR aged 80 and over OR frail elderly)(title:integrated care )                                                                                                                                                                                |
| (title:older adult OR middle aged OR aged OR aged 80 and over OR frail elderly)(title:integrated care )                                                                                                                                                                                |
| (title:older adult OR middle aged OR aged OR aged 80 and over OR frail elderly)(title:integrated care )                                                                                                                                                                                |
| (title:older adult OR middle aged OR aged OR aged 80 and over OR frail elderly)(title:integrated care )                                                                                                                                                                                |
| (title:(middle aged OR aged OR aged 80 and over OR frail elderly) AND (chronic condition OR chronic illnesses OR Chronic Disease OR Multiple Chronic Conditions OR Comorbidity OR Multimorbidity))(title:Health Public OR Health Systems OR Health Planning OR healthy People Program) |
| (title:(middle aged OR aged OR aged 80 and over OR frail elderly) AND (chronic condition OR chronic illnesses OR Chronic Disease OR Multiple Chronic Conditions OR Comorbidity OR Multimorbidity))(title:Clinical model OR Instructional Models OR Educational Models)                 |
| ((middle aged OR aged OR aged 80 and over OR frail elderly) AND (chronic condition OR chronic illnesses OR Chronic Disease OR Multiple Chronic Conditions OR Comorbidity OR Multimorbidity))((social protection systems OR social protection OR Social Policy OR Social Protection)    |

|                                                                                                                                                                                                                                                                                     |
|-------------------------------------------------------------------------------------------------------------------------------------------------------------------------------------------------------------------------------------------------------------------------------------|
| ((middle aged OR aged OR aged 80 and over OR frail elderly) AND (chronic condition OR chronic illnesses OR Chronic Disease OR Multiple Chronic Conditions OR Comorbidity OR Multimorbidity))((social protection systems OR social protection OR Social Policy OR Social Protection) |
| ((middle aged OR aged OR aged 80 and over OR frail elderly) AND (chronic condition OR chronic illnesses OR Chronic Disease OR Multiple Chronic Conditions OR Comorbidity OR Multimorbidity))((social protection systems OR social protection OR Social Policy OR Social Protection) |
| (title:(middle aged OR aged OR aged 80 and over OR frail elderly) AND (chronic condition OR chronic illnesses OR Chronic Disease OR Multiple Chronic Conditions OR Comorbidity OR Multimorbidity))(title:Medication Therapy Management OR management of chronic conditions )        |
| (title:(middle aged OR aged OR aged 80 and over OR frail elderly) AND (chronic condition OR chronic illnesses OR Chronic Disease OR Multiple Chronic Conditions OR Comorbidity OR Multimorbidity))(title:Medication Therapy Management OR management of chronic conditions )        |
| (title:(middle aged OR aged OR aged 80 and over OR frail elderly) AND (chronic condition OR chronic illnesses OR Chronic Disease OR Multiple Chronic Conditions OR Comorbidity OR Multimorbidity))(title:Medication Therapy Management OR management of chronic conditions )        |
| (title:(middle aged OR aged OR aged 80 and over OR frail elderly) AND (chronic condition OR chronic illnesses OR Chronic Disease OR Multiple Chronic Conditions OR Comorbidity OR Multimorbidity))(title:community based OR Population Based OR Health Care Community)              |
| (title:(middle aged OR aged OR aged 80 and over OR frail elderly) AND (chronic condition OR chronic illnesses OR Chronic Disease OR Multiple Chronic Conditions OR Comorbidity OR Multimorbidity))(title:community based OR Population Based OR Health Care Community)              |
| (title:(middle aged OR aged OR aged 80 and over OR frail elderly) AND (chronic condition OR chronic illnesses OR Chronic Disease OR Multiple Chronic Conditions OR Comorbidity OR Multimorbidity))(title:community based OR Population Based OR Health Care Community)              |
| (title:(middle aged OR aged OR aged 80 and over OR frail elderly) AND (chronic condition OR chronic illnesses OR Chronic Disease OR Multiple Chronic Conditions OR Comorbidity OR Multimorbidity))(title:community based OR Population Based OR Health Care Community)              |

| Cochrane Library                                                                                                                            |
|---------------------------------------------------------------------------------------------------------------------------------------------|
| Older Adult in Cochrane Reviews, Cochrane Protocols, Clinical Answers, Editorials, Special Collections (Word variations have been searched) |
| Chronic Disease in Cochrane Reviews, Cochrane Protocols, Clinical Answers, Editorials, Special Collections                                  |
| Multiple Chronic Conditions in Cochrane Reviews, Cochrane Protocols, Clinical Answers, Editorials, Special Collections                      |
| Comorbidity in Cochrane Reviews, Cochrane Protocols, Clinical Answers, Editorials, Special Collections                                      |
| Multimorbidity in Cochrane Reviews, Cochrane Protocols, Clinical Answers, Editorials, Special Collections                                   |
| #1 AND (#2 OR #3 OR #4 OR #5) in Cochrane Reviews, Cochrane Protocols, Clinical Answers, Editorials, Special                                |

|                                                                                                                                                                                                                                                                                                                                                                                                                                                  |
|--------------------------------------------------------------------------------------------------------------------------------------------------------------------------------------------------------------------------------------------------------------------------------------------------------------------------------------------------------------------------------------------------------------------------------------------------|
| Collections                                                                                                                                                                                                                                                                                                                                                                                                                                      |
| Primary Health Care in Cochrane Reviews, Cochrane Protocols, Clinical Answers, Editorials, Special Collections                                                                                                                                                                                                                                                                                                                                   |
| Community Health Services in Cochrane Reviews, Cochrane Protocols, Clinical Answers, Editorials, Special Collections                                                                                                                                                                                                                                                                                                                             |
| ((#1 AND (#2 OR #3 OR #4 OR #5)) AND (#7 OR #8)) in Cochrane Reviews, Cochrane Protocols, Clinical Answers, Editorials, Special Collections                                                                                                                                                                                                                                                                                                      |
| ((#1 AND (#2 OR #3 OR #4 OR #5)) AND #7) in Cochrane Reviews, Cochrane Protocols, Clinical Answers, Editorials, Special Collections                                                                                                                                                                                                                                                                                                              |
| (#2 OR #3 OR #4 OR #5) in Cochrane Reviews, Cochrane Protocols, Clinical Answers, Editorials, Special Collections                                                                                                                                                                                                                                                                                                                                |
| Middle Aged in Cochrane Reviews, Cochrane Protocols, Clinical Answers, Editorials, Special Collections                                                                                                                                                                                                                                                                                                                                           |
| Aged in Cochrane Reviews, Cochrane Protocols, Clinical Answers, Editorials, Special Collections                                                                                                                                                                                                                                                                                                                                                  |
| Aged, 80 and over in Cochrane Reviews, Cochrane Protocols, Clinical Answers, Editorials, Special Collections                                                                                                                                                                                                                                                                                                                                     |
| Frail Elderly in Cochrane Reviews, Cochrane Protocols, Clinical Answers, Editorials, Special Collections                                                                                                                                                                                                                                                                                                                                         |
| (#1 OR #12 OR #13 OR #14 OR #15) in Cochrane Reviews, Cochrane Protocols, Clinical Answers, Editorials, Special Collections                                                                                                                                                                                                                                                                                                                      |
| Care, Primary Health OR "Health Care, Primary" OR "Primary Healthcare" OR "Healthcare, Primary" OR "Primary Care" OR "Care, Primary" in Cochrane Reviews, Cochrane Protocols, Clinical Answers, Editorials, Special Collections                                                                                                                                                                                                                  |
| #7 OR #17 in Cochrane Reviews, Cochrane Protocols, Clinical Answers, Editorials, Special Collections                                                                                                                                                                                                                                                                                                                                             |
| Health Services, Community OR "Community Health Service" OR "Health Service, Community" OR "Service, Community Health" OR "Services, Community Health" OR "Community Health Care" OR "Care, Community Health" OR "Health Care, Community" OR "Community Healthcare" OR "Community Healthcares" OR "Healthcare, Community" OR "Healthcares, Community" in Cochrane Reviews, Cochrane Protocols, Clinical Answers, Editorials, Special Collections |
| Community Health Planning in Cochrane Reviews, Cochrane Protocols, Clinical Answers, Editorials, Special Collections                                                                                                                                                                                                                                                                                                                             |
| Community Medicine in Cochrane Reviews, Cochrane Protocols, Clinical Answers, Editorials, Special Collections                                                                                                                                                                                                                                                                                                                                    |
| Community Health Systems in Cochrane Reviews, Cochrane Protocols, Clinical Answers, Editorials, Special Collections                                                                                                                                                                                                                                                                                                                              |
| community-based approaches in Cochrane Reviews, Cochrane Protocols, Clinical Answers, Editorials, Special Collections                                                                                                                                                                                                                                                                                                                            |
| #8 OR #19 OR #20 OR #21 OR #22 OR #23 in Cochrane Reviews, Cochrane Protocols, Clinical Answers, Editorials, Special Collections                                                                                                                                                                                                                                                                                                                 |
| Models, Educational OR "Instructional Models" OR "Instructional Model" OR "Model, Instructional" OR "Models, Instructional" OR "Educational Models" OR "Educational Model" OR "Model, Educational" OR "care model" OR "clinical model" OR "Models of Care" in Cochrane Reviews, Cochrane Protocols, Clinical Answers, Editorials, Special Collections                                                                                            |
| Medication Therapy Management OR "Management, Medication Therapy" OR "Therapy Management, Medication" OR "Drug Therapy Management" OR "Management, Drug Therapy" OR "Therapy Management, Drug" OR "MEDICARE Prescription Drug" OR "Improvement and Modernization Act of 2003" OR "management of chronic conditions" in Cochrane Reviews, Cochrane Protocols, Clinical Answers, Editorials, Special Collections                                   |
| self-management OR "Self Management" OR "Management, Self" in Cochrane Reviews, Cochrane Protocols, Clinical Answers, Editorials, Special Collections                                                                                                                                                                                                                                                                                            |
| Public Policy OR "Healthy People Programs" OR "Policies, Public" OR "Policy, Public" OR "Public Policies" OR "Migration Policy" OR "Migration Policies" OR "Policies, Migration" OR "Policy, Migration" OR "Affirmative Action" OR "Action,                                                                                                                                                                                                      |

|                                                                                                                                                                                                                                                                                                                                                                                                                                                                                                                                                                             |
|-----------------------------------------------------------------------------------------------------------------------------------------------------------------------------------------------------------------------------------------------------------------------------------------------------------------------------------------------------------------------------------------------------------------------------------------------------------------------------------------------------------------------------------------------------------------------------|
| Affirmative" OR "Social Protection" OR "Protection, Social" OR "Population Policy" OR "Policies, Population" OR "Policy, Population" OR "Population Policies" OR "Social Policy" OR "Policies, Social" OR "Policy, Social" OR "Social Policies" OR "Healthy People Program" OR "Healthy People 2010" OR "Healthy People 2020" OR "Healthy People 2020s" OR "People 2020, Healthy" OR "Healthy People 2000" OR "Health system" OR "public health" OR "Public health intervention" in Cochrane Reviews, Cochrane Protocols, Clinical Answers, Editorials, Special Collections |
| healthcare intervention programs OR "social protection systems" OR "social protection" in Cochrane Reviews, Cochrane Protocols, Clinical Answers, Editorials, Special Collections                                                                                                                                                                                                                                                                                                                                                                                           |
| Integrated Care Older People OR "Integrated Care for Older People" in Cochrane Reviews, Cochrane Protocols, Clinical Answers, Editorials, Special Collections                                                                                                                                                                                                                                                                                                                                                                                                               |
| randomized controlled trial in Cochrane Reviews, Cochrane Protocols, Clinical Answers, Editorials, Special Collections                                                                                                                                                                                                                                                                                                                                                                                                                                                      |
| (#16 AND #11 AND #18 AND #31) AND #25 in Cochrane Reviews, Cochrane Protocols, Clinical Answers, Editorials, Special Collections                                                                                                                                                                                                                                                                                                                                                                                                                                            |
| (#16 AND #11 AND #18 AND #31) AND #26 in Cochrane Reviews, Cochrane Protocols, Clinical Answers, Editorials, Special Collections                                                                                                                                                                                                                                                                                                                                                                                                                                            |
| (#16 AND #11 AND #18 AND #31) AND #27 in Cochrane Reviews, Cochrane Protocols, Clinical Answers, Editorials, Special Collections                                                                                                                                                                                                                                                                                                                                                                                                                                            |
| (#16 AND #11 AND #18 AND #31) AND #28 in Cochrane Reviews, Cochrane Protocols, Clinical Answers, Editorials, Special Collections                                                                                                                                                                                                                                                                                                                                                                                                                                            |
| (#16 AND #11 AND #18 AND #31) AND #29 in Cochrane Reviews, Cochrane Protocols, Clinical Answers, Editorials, Special Collections                                                                                                                                                                                                                                                                                                                                                                                                                                            |
| (#16 AND #11 AND #18 AND #31) AND #30 in Cochrane Reviews, Cochrane Protocols, Clinical Answers, Editorials, Special Collections                                                                                                                                                                                                                                                                                                                                                                                                                                            |
| (#16 AND #11 AND #24 AND #31) AND #25 in Cochrane Reviews, Cochrane Protocols, Clinical Answers, Editorials, Special Collections                                                                                                                                                                                                                                                                                                                                                                                                                                            |
| (#16 AND #11 AND #24 AND #31) AND #26 in Cochrane Reviews, Cochrane Protocols, Clinical Answers, Editorials, Special Collections                                                                                                                                                                                                                                                                                                                                                                                                                                            |
| (#16 AND #11 AND #24 AND #31) AND #27 in Cochrane Reviews, Cochrane Protocols, Clinical Answers, Editorials, Special Collections                                                                                                                                                                                                                                                                                                                                                                                                                                            |
| (#16 AND #11 AND #24 AND #31) AND #28 in Cochrane Reviews, Cochrane Protocols, Clinical Answers, Editorials, Special Collections                                                                                                                                                                                                                                                                                                                                                                                                                                            |
| (#16 AND #11 AND #24 AND #31) AND #29 in Cochrane Reviews, Cochrane Protocols, Clinical Answers, Editorials, Special Collections                                                                                                                                                                                                                                                                                                                                                                                                                                            |
| (#16 AND #11 AND #24 AND #31) AND #30 in Cochrane Reviews, Cochrane Protocols, Clinical Answers, Editorials, Special Collections                                                                                                                                                                                                                                                                                                                                                                                                                                            |

### Cochrane CENTRAL

Older Adult in Trials (Word variations have been searched)

|                                                                                                                                                                                                                                                                                                                                                       |
|-------------------------------------------------------------------------------------------------------------------------------------------------------------------------------------------------------------------------------------------------------------------------------------------------------------------------------------------------------|
| Chronic Disease in Trials                                                                                                                                                                                                                                                                                                                             |
| Multiple Chronic Conditions in Trials                                                                                                                                                                                                                                                                                                                 |
| Comorbidity in Trials                                                                                                                                                                                                                                                                                                                                 |
| Multimorbidity in Trials                                                                                                                                                                                                                                                                                                                              |
| #1 AND (#2 OR #3 OR #4 OR #5) with Cochrane Library publication date Between Jan 1966 and Aug 2020, in Trials                                                                                                                                                                                                                                         |
| Primary Health Care in Trials                                                                                                                                                                                                                                                                                                                         |
| Community Health Services in Trials                                                                                                                                                                                                                                                                                                                   |
| ((#1 AND (#2 OR #3 OR #4 OR #5)) AND (#7 OR #8)) in Trials                                                                                                                                                                                                                                                                                            |
| ((#1 AND (#2 OR #3 OR #4 OR #5)) AND #7) in Trials                                                                                                                                                                                                                                                                                                    |
| (#2 OR #3 OR #4 OR #5) in Trials                                                                                                                                                                                                                                                                                                                      |
| Middle Aged in Trials                                                                                                                                                                                                                                                                                                                                 |
| Aged in Trials                                                                                                                                                                                                                                                                                                                                        |
| Aged, 80 and over in Trials                                                                                                                                                                                                                                                                                                                           |
| Frail Elderly in Trials                                                                                                                                                                                                                                                                                                                               |
| (#1 OR #12 OR #13 OR #14 OR #15) in Trials                                                                                                                                                                                                                                                                                                            |
| Care, Primary Health OR "Health Care, Primary" OR "Primary Healthcare" OR "Healthcare, Primary" OR "Primary Care" OR "Care, Primary" in Trials                                                                                                                                                                                                        |
| #7 OR #17 in Trials                                                                                                                                                                                                                                                                                                                                   |
| Health Services, Community OR "Community Health Service" OR "Health Service, Community" OR "Service, Community Health" OR "Services, Community Health" OR "Community Health Care" OR "Care, Community Health" OR "Health Care, Community" OR "Community Healthcare" OR "Community Healthcares" OR "Healthcare, Community" OR "Healthcares, Community" |
| Community Health Planning in Trials                                                                                                                                                                                                                                                                                                                   |
| Community Medicine in Trials                                                                                                                                                                                                                                                                                                                          |
| Community Health Systems in Trials                                                                                                                                                                                                                                                                                                                    |
| community-based approaches in Trials                                                                                                                                                                                                                                                                                                                  |
| #8 OR #19 OR #20 OR #21 OR #22 OR #23 in Trials                                                                                                                                                                                                                                                                                                       |
| Models, Educational OR "Instructional Models" OR "Instructional Model" OR "Model, Instructional" OR "Models, Instructional" OR "Educational Models" OR "Educational Model" OR "Model, Educational" OR "care model" OR "clinical model" OR "Models of Care" in Trials                                                                                  |
| Medication Therapy Management OR "Management, Medication Therapy" OR "Therapy Management, Medication" OR "Drug Therapy Management" OR "Management, Drug Therapy" OR "Therapy Management, Drug" OR "MEDICARE Prescription Drug" OR "Improvement and Modernization Act of 2003" OR "management of chronic conditions" in Trials                         |
| self-management OR "Self Management" OR "Management, Self" in Trials                                                                                                                                                                                                                                                                                  |



|                                                                                                                                                                                                                                                                                                                                                                                                                                                                                                                                                                                                                                                                                                                                        |
|----------------------------------------------------------------------------------------------------------------------------------------------------------------------------------------------------------------------------------------------------------------------------------------------------------------------------------------------------------------------------------------------------------------------------------------------------------------------------------------------------------------------------------------------------------------------------------------------------------------------------------------------------------------------------------------------------------------------------------------|
| Public Policy OR "Healthy People Programs" OR "Policies, Public" OR "Policy, Public" OR "Public Policies" OR "Migration Policy" OR "Migration Policies" OR "Policies, Migration" OR "Policy, Migration" OR "Affirmative Action" OR "Action, Affirmative" OR "Social Protection" OR "Protection, Social" OR "Population Policy" OR "Policies, Population" OR "Policy, Population" OR "Population Policies" OR "Social Policy" OR "Policies, Social" OR "Policy, Social" OR "Social Policies" OR "Healthy People Program" OR "Healthy People 2010" OR "Healthy People 2020" OR "Healthy People 2020s" OR "People 2020, Healthy" OR "Healthy People 2000" OR "Health system" OR "public health" OR "Public health intervention" in Trials |
| healthcare intervention programs OR "social protection systems" OR "social protection" in Trials                                                                                                                                                                                                                                                                                                                                                                                                                                                                                                                                                                                                                                       |
| Integrated Care Older People OR "Integrated Care for Older People" in Trials                                                                                                                                                                                                                                                                                                                                                                                                                                                                                                                                                                                                                                                           |
| (#16 AND #11 AND #18) AND #25 in Trials                                                                                                                                                                                                                                                                                                                                                                                                                                                                                                                                                                                                                                                                                                |
| (#16 AND #11 AND #18) AND #26 in Trials                                                                                                                                                                                                                                                                                                                                                                                                                                                                                                                                                                                                                                                                                                |
| (#16 AND #11 AND #18) AND #27 in Trials                                                                                                                                                                                                                                                                                                                                                                                                                                                                                                                                                                                                                                                                                                |
| (#16 AND #11 AND #18) AND #28 in Trials                                                                                                                                                                                                                                                                                                                                                                                                                                                                                                                                                                                                                                                                                                |
| (#16 AND #11 AND #18) AND #29 in Trials                                                                                                                                                                                                                                                                                                                                                                                                                                                                                                                                                                                                                                                                                                |
| (#16 AND #11 AND #18) AND #30 in Trials                                                                                                                                                                                                                                                                                                                                                                                                                                                                                                                                                                                                                                                                                                |
| (#16 AND #11 AND #24) AND #25 in Trials                                                                                                                                                                                                                                                                                                                                                                                                                                                                                                                                                                                                                                                                                                |
| (#16 AND #11 AND #24) AND #26 in Trials                                                                                                                                                                                                                                                                                                                                                                                                                                                                                                                                                                                                                                                                                                |
| (#16 AND #11 AND #24) AND #27 in Trials                                                                                                                                                                                                                                                                                                                                                                                                                                                                                                                                                                                                                                                                                                |
| (#16 AND #11 AND #24) AND #28 in Trials                                                                                                                                                                                                                                                                                                                                                                                                                                                                                                                                                                                                                                                                                                |
| (#16 AND #11 AND #24) AND #29 in Trials                                                                                                                                                                                                                                                                                                                                                                                                                                                                                                                                                                                                                                                                                                |
| (#16 AND #11 AND #24) AND #30                                                                                                                                                                                                                                                                                                                                                                                                                                                                                                                                                                                                                                                                                                          |
