# Supplementary material for: Models of comprehensive care for older persons with chronic diseases: a systematic review with a focus on effectiveness
Source: HighWire-hosted journal article supplement (doi:10.1136/bmjopen-2021-059606), 2022-08-01
Supplement: bmjopen-2021-059606supp002_data_supplement.pdf [file bmjopen-2021-059606supp002_data_supplement.pdf]

**Supplementary Table 1. Topics covered by the educational meeting interventions**

| Study                              | Topics of educational meetings                                                                                                                                                                                                                                                                                                                                                                                                | Aimed at                |
|------------------------------------|-------------------------------------------------------------------------------------------------------------------------------------------------------------------------------------------------------------------------------------------------------------------------------------------------------------------------------------------------------------------------------------------------------------------------------|-------------------------|
| <b>Beck 1997</b> <sup>29</sup>     | 1. Medications and drug-related problems<br>2. Exercise<br>3. Nutrition<br>4. Alternate care<br>5. Skilled nursing facilities<br>6. Home safety<br>7. Advance directives<br>8. Use of emergency care services                                                                                                                                                                                                                 | Patients                |
| <b>Leveille 1998</b> <sup>30</sup> | 1. Nutrition tip sheets<br>2. Health promotion course,<br>3. Physical activity (walking, swimming, dancing, tai chi and a supervised endurance, strength and flexibility training programme)<br>4. Home exercise options<br>5. Chronic Illness Self-Management Course, (disease self-management concepts)                                                                                                                     | Patients                |
| <b>Coleman 1999</b> <sup>31</sup>  | 1. Polypharmacy and medications associated with functional decline.<br>2. Self-management skills and group problem solving for chronic health problems<br>3. Topics about physical activity, nutrition and advanced care planning (individual groups)                                                                                                                                                                         | Patients                |
| <b>Scott 2004</b> <sup>33</sup>    | 1. Patient care notebooks<br>2. Routine health maintenance<br>3. Pharmacy brown bags<br>4. Advanced directives<br>5. Emergency care and<br>6. Continuing care<br>7. Chronic pain<br>8. Nutrition<br>9. Exercise<br>10. Home safety<br>11. Disease processes such as stroke, hypertension, arthritis, osteoporosis and Alzheimer's disease                                                                                     | Patients                |
| <b>Meng 2005</b> <sup>21</sup>     | 1. Information and assistance on hiring and firing in-home workers<br>2. Instructions and assistance relating to billing and income tax issues<br>3. Relevant knowledge and skills on how to conduct disease self-management<br>4. Health-behaviour change strategies (empower individuals to engage in behaviour change, develop and sustain motivation, develop behavioural skills and participate in community activities) | Patients and caregivers |
| <b>Lin 2006</b> <sup>34</sup>      | 1. Education and behavioural activation<br>2. Identify depression treatment preferences<br>3. Arthritis-related problems<br>4. Problem-Solving                                                                                                                                                                                                                                                                                | Patients                |

|                                     |                                                                                                                                             |                                                              |          |
|-------------------------------------|---------------------------------------------------------------------------------------------------------------------------------------------|--------------------------------------------------------------|----------|
| <b>Hochhalter 2010<sup>41</sup></b> | 1. Prepare for healthcare appointments<br>2. Communicate effectively and gather information and support during healthcare appointments and  | 3. Follow through on plans of care                           | Patients |
| <b>Lamers 2010<sup>22</sup></b>     | 1. Responsibility for day-to-day management of their own illness and its consequences<br>2. Cognitive-behavioural therapy & self-management | 3. Reattribution of negative cognitions, and problem solving | Patients |
| <b>Touchette 2012<sup>24</sup></b>  | 1. Provide education and counselling to improve enrollees' understanding of their medications                                               | 2. Improve adherence to medications                          | Patients |
| <b>Moral 2015<sup>25</sup></b>      | 1. Patient safety and medication adherence                                                                                                  | 2. Motivational interviewing                                 | Patients |
| <b>Toots 2019<sup>38</sup></b>      | 1. Exercise (high-intensity functional exercise programme)                                                                                  |                                                              | Patients |
