# Supplementary material for: Models of comprehensive care for older persons with chronic diseases: a systematic review with a focus on effectiveness
Source: HighWire-hosted journal article supplement (doi:10.1136/bmjopen-2021-059606), 2022-08-01
Supplement: bmjopen-2021-059606supp004_data_supplement.pdf [file bmjopen-2021-059606supp004_data_supplement.pdf]

|                 | Random sequence generation (selection bias) | Allocation concealment (selection bias) | Blinding of participants and personnel (performance bias) | Blinding of outcome assessment (detection bias) | Incomplete outcome data (attrition bias) | Selective reporting (reporting bias) |
|-----------------|---------------------------------------------|-----------------------------------------|-----------------------------------------------------------|-------------------------------------------------|------------------------------------------|--------------------------------------|
| Beck 1997       | +                                           | ?                                       | -                                                         | ?                                               | +                                        | +                                    |
| Leveille 1998   | +                                           | ?                                       | -                                                         | ?                                               | +                                        | +                                    |
| Coleman 1999    | +                                           | ?                                       | ?                                                         | +                                               | +                                        | +                                    |
| Coleman 2001    | ?                                           | ?                                       | ?                                                         | ?                                               | +                                        | +                                    |
| Dubbert 2002    | ?                                           | ?                                       | ?                                                         | +                                               | +                                        | +                                    |
| Cucinotta 2004  | ?                                           | ?                                       | ?                                                         | +                                               | -                                        | ?                                    |
| Scott 2004      | +                                           | ?                                       | ?                                                         | ?                                               | -                                        | ?                                    |
| Harpole 2005    | ?                                           | ?                                       | ?                                                         | ?                                               | ?                                        | -                                    |
| Meng 2005       | ?                                           | ?                                       | ?                                                         | ?                                               | ?                                        | -                                    |
| Lin 2006        | ?                                           | ?                                       | ?                                                         | ?                                               | ?                                        | ?                                    |
| Battersby 2007  | -                                           | ?                                       | +                                                         | ?                                               | -                                        | -                                    |
| Counsell 2007   | -                                           | ?                                       | -                                                         | ?                                               | +                                        | +                                    |
| Hochhalter 2010 | +                                           | ?                                       | +                                                         | -                                               | +                                        | +                                    |
| Lamers 2010     | +                                           | ?                                       | ?                                                         | +                                               | -                                        | -                                    |
| Jonkers 2012    | +                                           | ?                                       | ?                                                         | +                                               | +                                        | -                                    |
| Touchette 2012  | ?                                           | ?                                       | ?                                                         | +                                               | +                                        | ?                                    |
| Boult 2013      | +                                           | ?                                       | +                                                         | ?                                               | -                                        | +                                    |
| Moral 2015      | ?                                           | ?                                       | ?                                                         | ?                                               | +                                        | -                                    |
| Köberlein 2016  | -                                           | -                                       | -                                                         | -                                               | +                                        | -                                    |
| Fried 2017      | ?                                           | ?                                       | ?                                                         | -                                               | +                                        | -                                    |
| Schäfer 2018    | +                                           | ?                                       | -                                                         | +                                               | +                                        | +                                    |
| Duggleby 2018   | +                                           | -                                       | -                                                         | ?                                               | +                                        | +                                    |
| Toots 2019      | +                                           | ?                                       | +                                                         | +                                               | +                                        | +                                    |
| Poot 2019       | ?                                           | ?                                       | ?                                                         | ?                                               | -                                        | +                                    |
| Ford 2019       | ?                                           | +                                       | +                                                         | +                                               | +                                        | +                                    |
