# Supplementary material for: Models of comprehensive care for older persons with chronic diseases: a systematic review with a focus on effectiveness
Source: HighWire-hosted journal article supplement (doi:10.1136/bmjopen-2021-059606), 2022-08-01

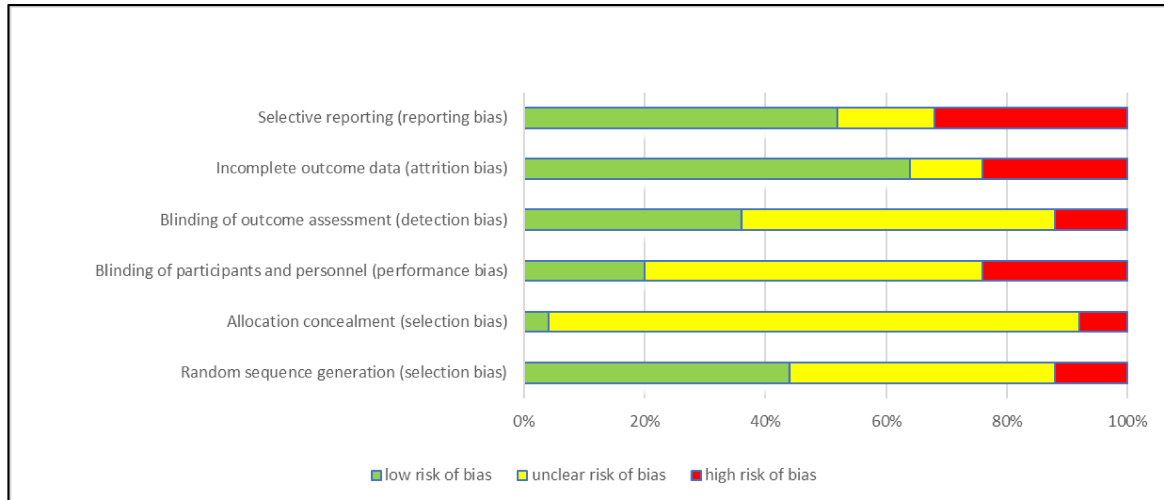

Supplement: bmjopen-2021-059606supp005_data_supplement.pdf [file bmjopen-2021-059606supp005_data_supplement.pdf]
